# Supplementary material for: Synthesis, spectral characterization, and catalytic efficiency of aroylhydrazone-based Cu(ii) complexes
Source: Royal Society of Chemistry journal article supplement (doi:10.1039/d3nj03603k), 2023-01-01
Supplement: d3nj03603k1.pdf [file d3nj03603k1.pdf]

*Supporting Information for*

## Synthesis, spectral characterization, and catalytic efficiency of aroylhydrazone-based Cu(II) complexes

Lahinakillathu Nishana <sup>a</sup>, Ayyamperumal Sakthivel <sup>a</sup>, M. R Prathapachandra Kurup <sup>a\*</sup>,  
Krishna K Damodaran <sup>b</sup>, Antonysamy Kulandaisamy <sup>c</sup>, Maheswaran Sithambaresan <sup>d</sup>

<sup>a</sup> *Inorganic Materials & Heterogeneous Catalysis Laboratory, Department of Chemistry,  
School of Physical Sciences, Central University of Kerala, Kasaragod, 671316, India*

<sup>b</sup> *Department of Chemistry, Science Institute, University of Iceland, Dunhagi 3, 107 Reykjavik,  
Iceland.*

<sup>c</sup> *Department of Chemistry, Faculty of Science, Eastern University, Chenkalady, Sri Lanka*

<sup>d</sup> *Department of Chemistry, Government Arts and Science College, Tamil Nadu, Sivakasi, India*

\*E-mail: [sakthiveldu@gmail.com](mailto:sakthiveldu@gmail.com) / [sakthivelcuk@cukerala.ac.in](mailto:sakthivelcuk@cukerala.ac.in) / [mrpcusat@gmail.com](mailto:mrpcusat@gmail.com)

ORCID information: <https://orcid.org/0000-0003-2330-5192>

ORCID information: <https://orcid.org/0000-0002-9434-890X>

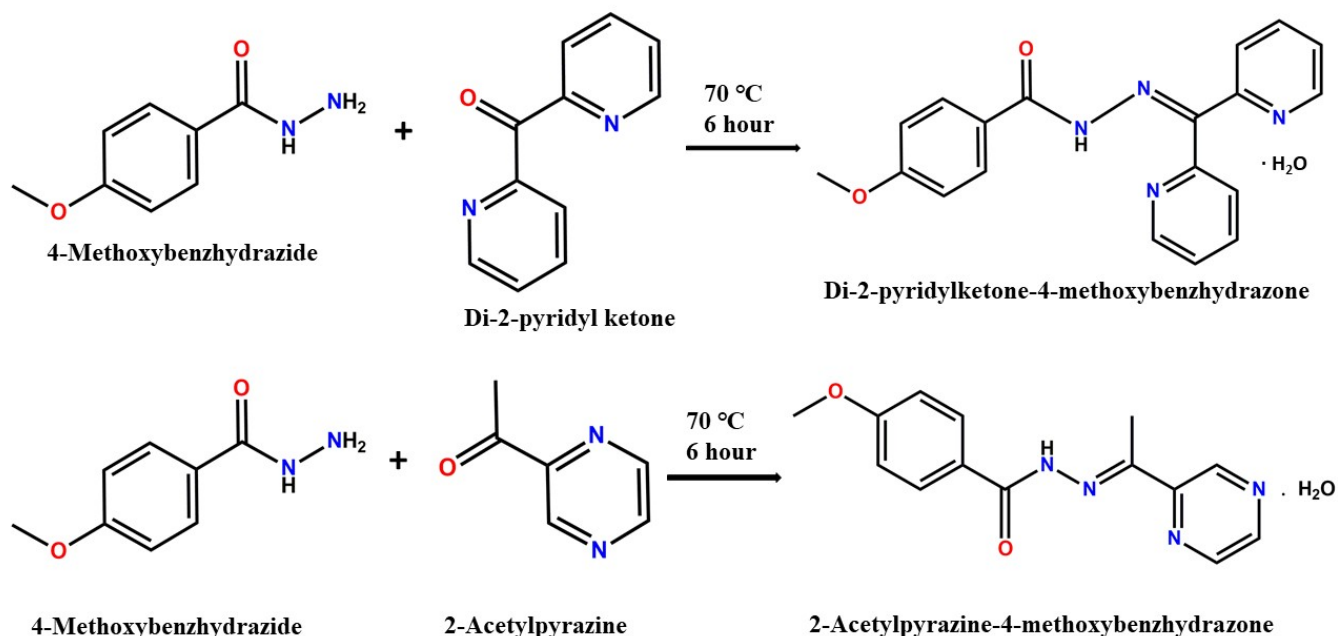

**Scheme S1:** Synthesis of di-2-pyridyl ketone-4-methoxybenzhydrazone monohydrate(DKMBH·H<sub>2</sub>O) and 2-acetylpyrazine-4-methoxybenzhydrazone monohydrate(APMBH·H<sub>2</sub>O)

**Table S1:** Hydrogen bonding interactions in APMBH·H<sub>2</sub>O and complex 4.

| Hydrogen bonding interactions                                                     |            |              |              |            |
|-----------------------------------------------------------------------------------|------------|--------------|--------------|------------|
| D–H···A                                                                           | d(D–H) (Å) | d(H···A) (Å) | d(D···A) (Å) | <(DHA) (°) |
| APMBH·H <sub>2</sub> O                                                            |            |              |              |            |
| N(4)–H(4)···O(3)                                                                  | 0.87       | 2.18         | 3.019(2)     | 159        |
| O(3)–H(3A)···N(2)#1                                                               | 0.85       | 2.05         | 2.886(2)     | 167        |
| O(3)–H(3B)···O(1)#2                                                               | 0.85       | 2.06         | 2.876(2)     | 161        |
| #1 = x, 1+y, z<br>#2 = 1-x, -y, -z                                                |            |              |              |            |
| Complex 4                                                                         |            |              |              |            |
| O(3)–H(3A)···O(5)#1                                                               | 0.82(2)    | 2.16(2)      | 2.785(2)     | 133.0(18)  |
| O(3)–H(3B)···N(4)#2                                                               | 0.84(2)    | 2.02(2)      | 2.852(2)     | 170.9(19)  |
| C(3)–H(3)···O(6)#3                                                                | 0.93       | 2.31         | 3.181(2)     | 156        |
| #1 = -1+x, y, z<br>#2 = 1-x, -y, 2-z<br>#3 = x, y, 1+z<br>D = donor, A = acceptor |            |              |              |            |

**Table S2:** Cg  $\cdots$  Cg interactions parameters in APMBH $\cdot$ H<sub>2</sub>O and complex4.

| Cg $\cdots$ Cg interactions                                                                                                                                                                                                                                                    |                   |              |             |
|--------------------------------------------------------------------------------------------------------------------------------------------------------------------------------------------------------------------------------------------------------------------------------|-------------------|--------------|-------------|
| Cg $\cdots$ Cg                                                                                                                                                                                                                                                                 | Cg $\cdots$ Cg(Å) | $\alpha$ (°) | $\beta$ (°) |
| APMBH $\cdot$ H <sub>2</sub> O                                                                                                                                                                                                                                                 |                   |              |             |
| Cg(1) $\cdots$ Cg(2)#1                                                                                                                                                                                                                                                         | 3.6099(11)        | 0.25(9)      | 18.8        |
| Cg(1) = N(1), C(1), C(2), N(2), C(3), C(4)<br>Cg(2) = C(7), C(8), C(9), C(10), C(11), C(12)<br>#1 = 1-x, -y, -z                                                                                                                                                                |                   |              |             |
| Complex 4                                                                                                                                                                                                                                                                      |                   |              |             |
| Cg(1) $\cdots$ Cg(2)#1                                                                                                                                                                                                                                                         | 3.9036(12)        | 11.38(9)     | 28.8        |
| Cg(1) = N(1), C(1), C(2), N(2), C(3), C(4)<br>Cg(2) = C(7), C(8), C(9), C(10), C(11), C(12)<br>#1 = 1-x, -y, 2-z<br>Cg, Centroid of the ring<br>$\alpha$ (°) = Dihedral angle between planes I and J<br>$\beta$ (°) = Angle between Cg(I) $\cdots$ Cg(J) vector and Cg(J) perp |                   |              |             |

**Table S3:** Catalytic study of various Cu(II) complexes on cinnamyl alcohol oxidation. #

| Complex                                          | Conversion (%) | Selectivity (%) |                      |                        |               |              |
|--------------------------------------------------|----------------|-----------------|----------------------|------------------------|---------------|--------------|
|                                                  |                | Cinnamaldehyde  | Epoxy cinnamaldehyde | Epoxy cinnamyl alcohol | Cinnamic acid | Benzaldehyde |
| [Cu(DKMB)Cl] (1)                                 | 79             | 74              | 1                    | 3                      | 1             | 21           |
| [Cu(DKMB)NO <sub>3</sub> ] (2)                   | 26             | 81              | 5                    | 1                      | 1             | 12           |
| [Cu(APMBH)Cl <sub>2</sub> ] (3)                  | 88             | 52              | 3                    | 6                      | 15            | 24           |
| [Cu(APMB)NO <sub>3</sub> (H <sub>2</sub> O)] (4) | 71             | 69              | 2                    | 4                      | 5             | 20           |

# Reaction conditions: Solvent = 2mL, Complex 1 (Catalyst) =  $12 \times 10^{-3}$  mmol, Cinnamaldehyde (Substrate) = 132  $\mu$ L (1 mmol), TBHP in water (oxidant) = 276  $\mu$ L (2 mmol),  $t = 4$  h;  $T = 70$  °C.

**Table S4:** Comparative study of existing reported catalytic system on cinnamyl alcohol oxidation

| Catalyst                                                                                                                                                                               | Conversion (%)  | Selectivity <sup>a</sup> (%) | Reaction Condition                                                            | Ref.       |
|----------------------------------------------------------------------------------------------------------------------------------------------------------------------------------------|-----------------|------------------------------|-------------------------------------------------------------------------------|------------|
| Cu(II) aroylhydrazone complexes                                                                                                                                                        | 79              | 74                           | TBHP in water, 70 °C, 4 h, Acetonitrile                                       | This paper |
| Cu(II)-triphenyl acetate/bipyridyl complex                                                                                                                                             | 91.5            | 6.6 <sup>b</sup>             | H <sub>2</sub> O <sub>2</sub> , 70 °C, 6 h, water solvent                     | 76         |
| [Cu(PPh <sub>3</sub> )(L)] (where L = dianion tridentate Schiff bases)                                                                                                                 | 60.23           | 100                          | <i>N</i> -methylmorpholine- <i>N</i> -oxide, 3 h, dichloromethane             | 77         |
| Cu(II) Complexes of N <sub>6</sub> O <sub>4</sub> Macrocyclic Ligand                                                                                                                   | 81              | 57                           | TEMPO, K <sub>2</sub> CO <sub>3</sub> (aq), 70 °C, 1 atm air                  | 78         |
| ([Cu(OOC(C <sub>6</sub> H <sub>5</sub> )Br)(C <sub>10</sub> H <sub>9</sub> N <sub>3</sub> )](ClO <sub>4</sub> )),([aqua(4-bromobenzoato)(2,2'-dipyridylamine)copper(II)](perchlorate)) | 90              | 10 <sup>c</sup>              | H <sub>2</sub> O <sub>2</sub> , 70 °C, 6 h, water solvent                     | 79         |
| copper (II) complexes with ( $\mu$ -diphenylphosphinato)-bridges                                                                                                                       | 7               | 100                          | 1 atm O <sub>2</sub> , Room temperature, 7 h, acetonitrile solvent            | 80         |
| [CuCl(HL <sub>1</sub> )(PPh <sub>3</sub> ) <sub>2</sub> ] (where HL <sub>1</sub> = 3,3-diphenyl-1-(2,4-dichlorobenzoyl)thiourea                                                        | 92 <sup>d</sup> | -                            | H <sub>2</sub> O <sub>2</sub> , 70 °C, 48 h, [bmim][PF <sub>6</sub> ] solvent | 81         |
| Copper(II) complex of o-phenyldiamido ligand                                                                                                                                           | 85              | 100                          | Atm O <sub>2</sub> , RT, 24h, DMF                                             | 82         |

<sup>a</sup> Selectivity of cinnamaldehyde; <sup>b</sup> The major product is benzaldehyde (84.9%);

<sup>c</sup> The major product is benzaldehyde (74%); <sup>d</sup> The major product is cinnamic acid (100%)

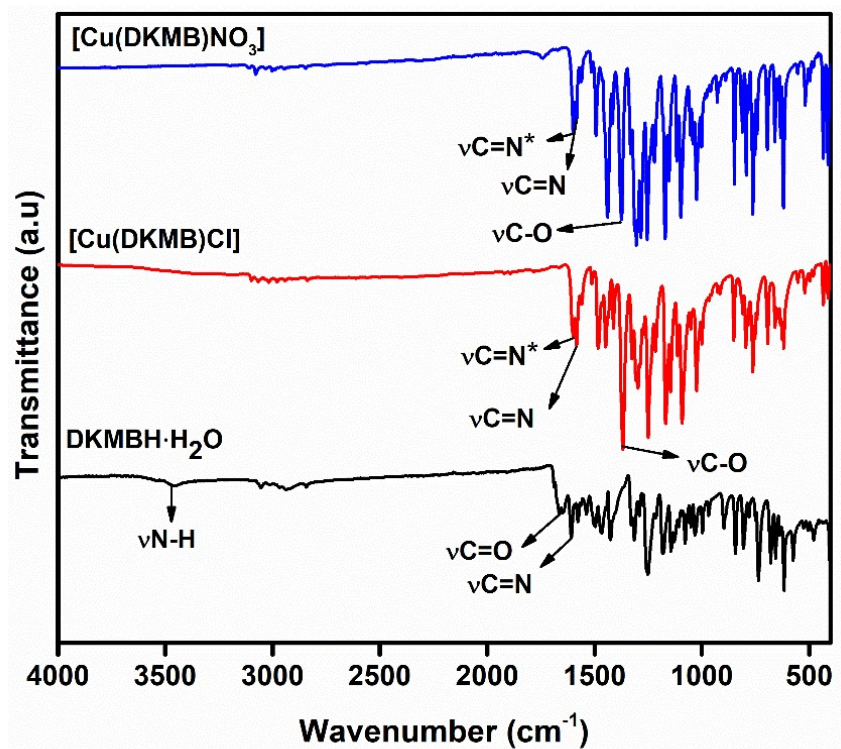

Fig. S1: FT-IR spectra of  $\text{DKMBH}\cdot\text{H}_2\text{O}$ ,  $[\text{Cu}(\text{DKMB})\text{Cl}]$  (1) and  $[\text{Cu}(\text{DKMB})\text{NO}_3]$  (2).

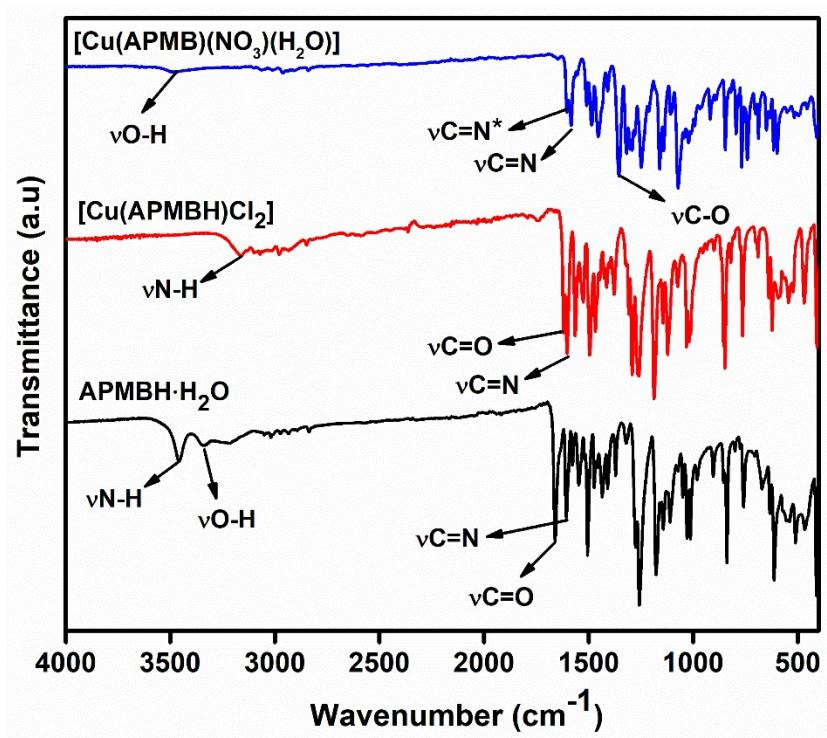

Fig.S2: FT-IR spectra of  $\text{APMBH}\cdot\text{H}_2\text{O}$ ,  $[\text{Cu}(\text{APMBH})\text{Cl}_2]$  (3) and  $[\text{Cu}(\text{APMB})\text{NO}_3(\text{H}_2\text{O})]$  (4).

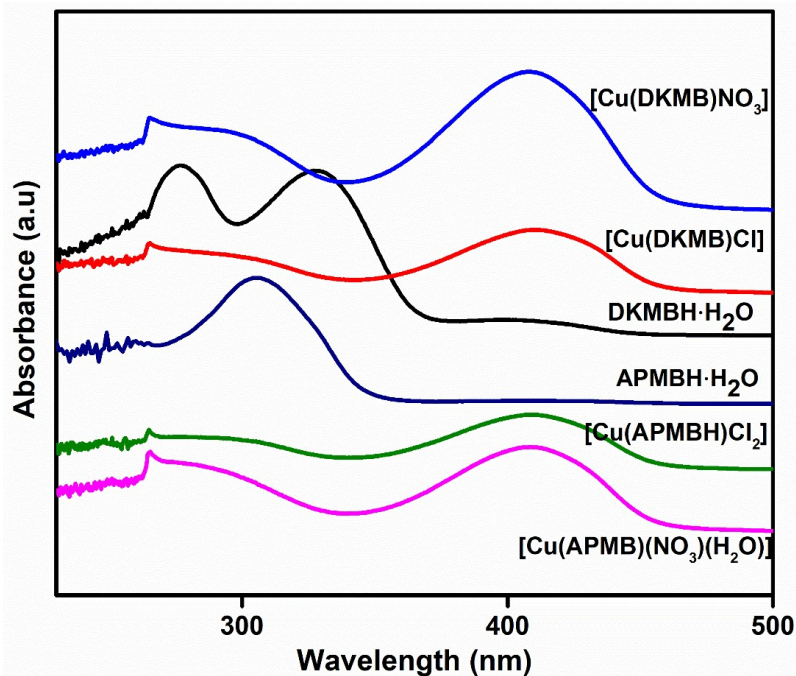

**Fig.S3:** UV-Vis spectra of DKMBH·H<sub>2</sub>O, APMBH·H<sub>2</sub>O [Cu(DKMB)Cl] (1), [Cu(DKMB)NO<sub>3</sub>] (2), [Cu(APMBH)Cl<sub>2</sub>] (3) and [Cu(APMB)NO<sub>3</sub>(H<sub>2</sub>O)] (4).

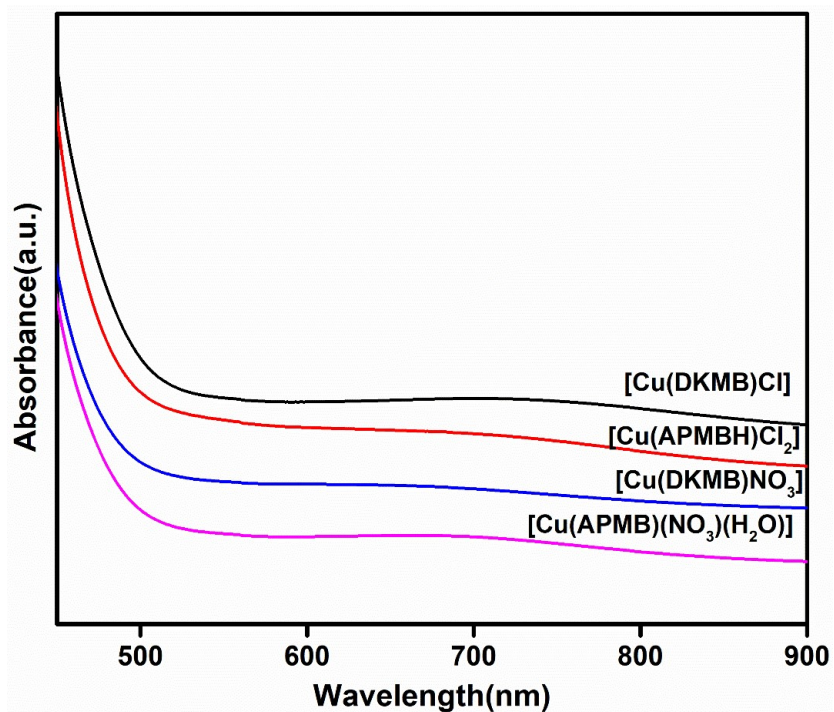

**Fig.S4:** Expanded Vis spectra (500-900 nm) of [Cu(DKMB)Cl] (1), [Cu(DKMB)NO<sub>3</sub>] (2), [Cu(APMBH)Cl<sub>2</sub>] (3) and [Cu(APMB)NO<sub>3</sub>(H<sub>2</sub>O)] (4).

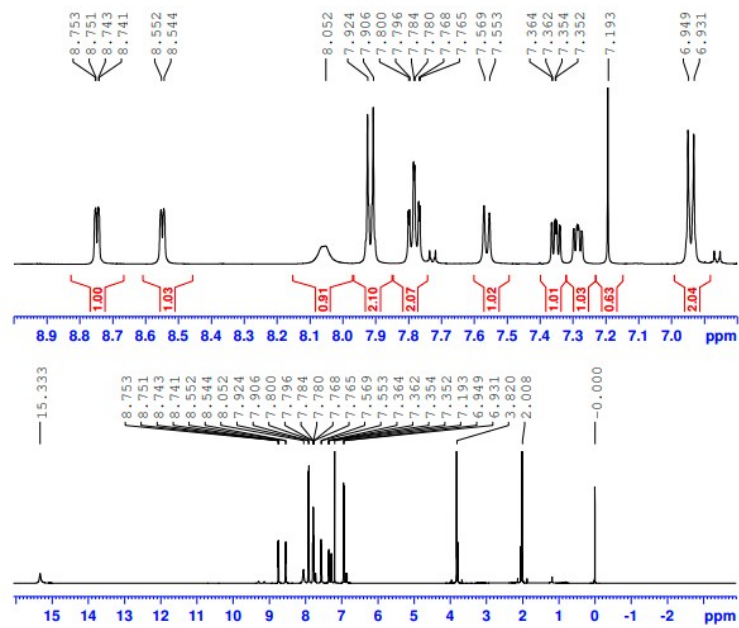

Fig.S5:  $^1\text{H}$  NMR spectrum of DKMBH·H<sub>2</sub>O.

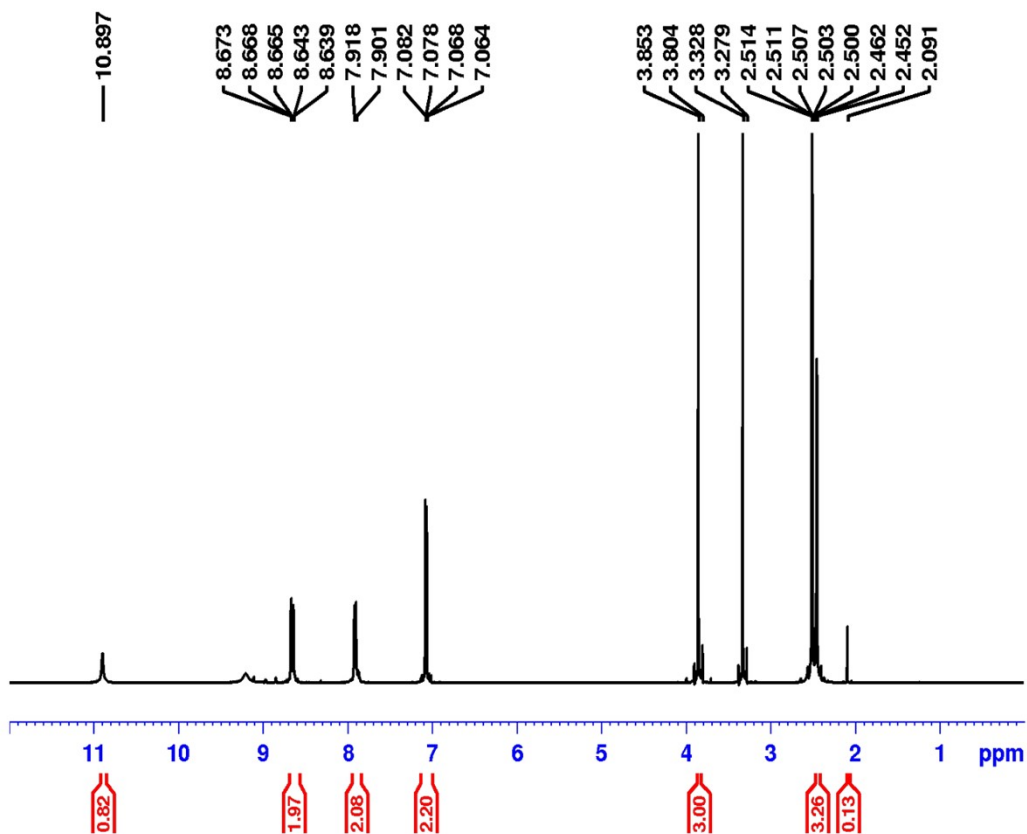

Fig.S6:  $^1\text{H}$  NMR spectrum of APMBH·H<sub>2</sub>O.



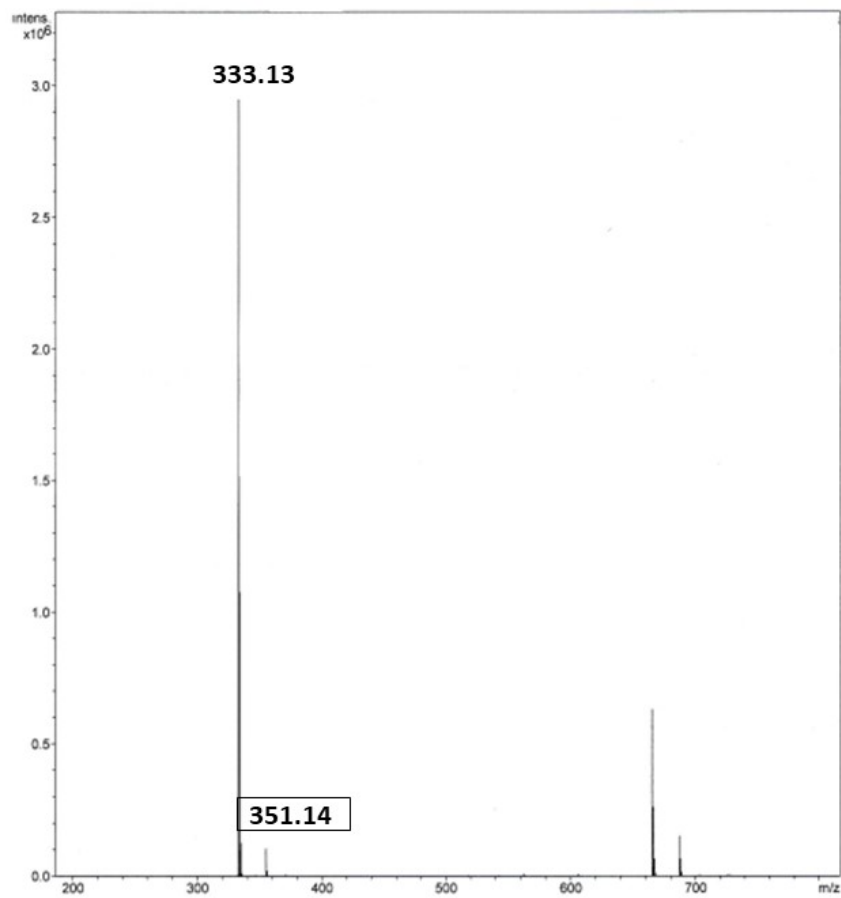

**Fig.S7:** Mass spectrum of DKMBH·H<sub>2</sub>O.

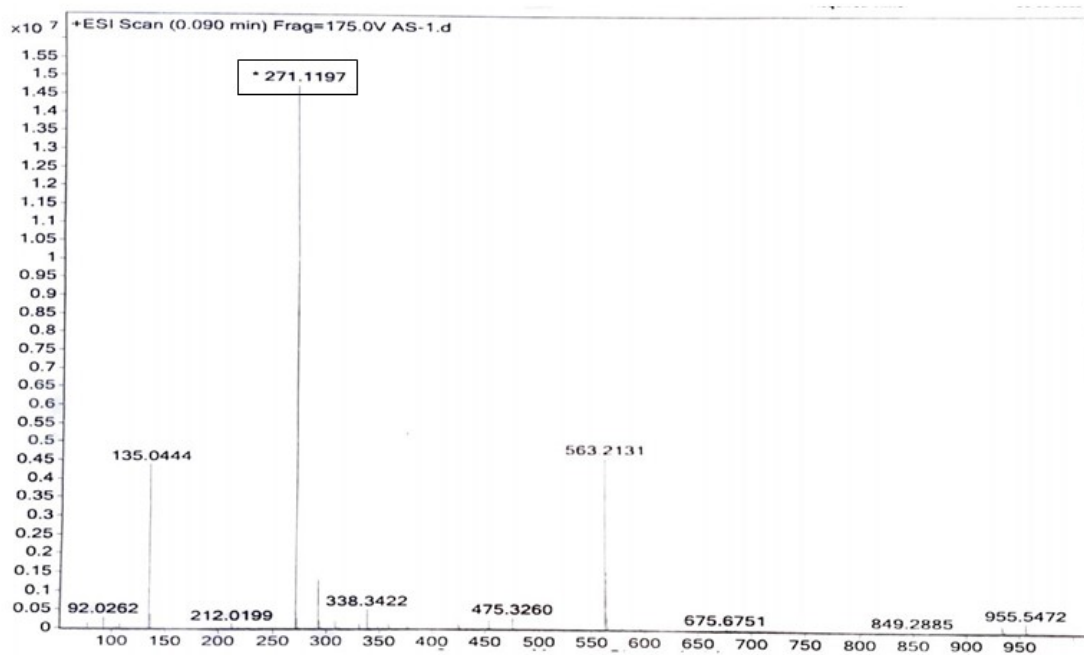

Fig.S8: Mass spectrum of APMBH·H<sub>2</sub>O.

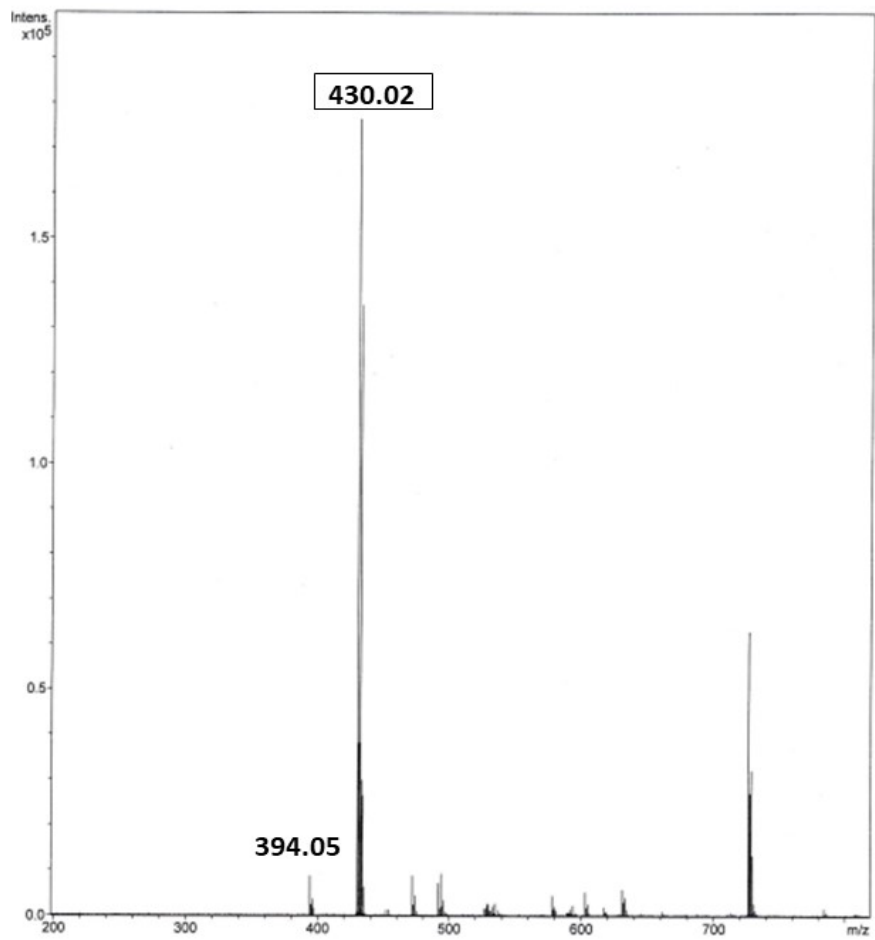

**Fig.S9:** Mass spectrum of [Cu(DKMB)Cl].

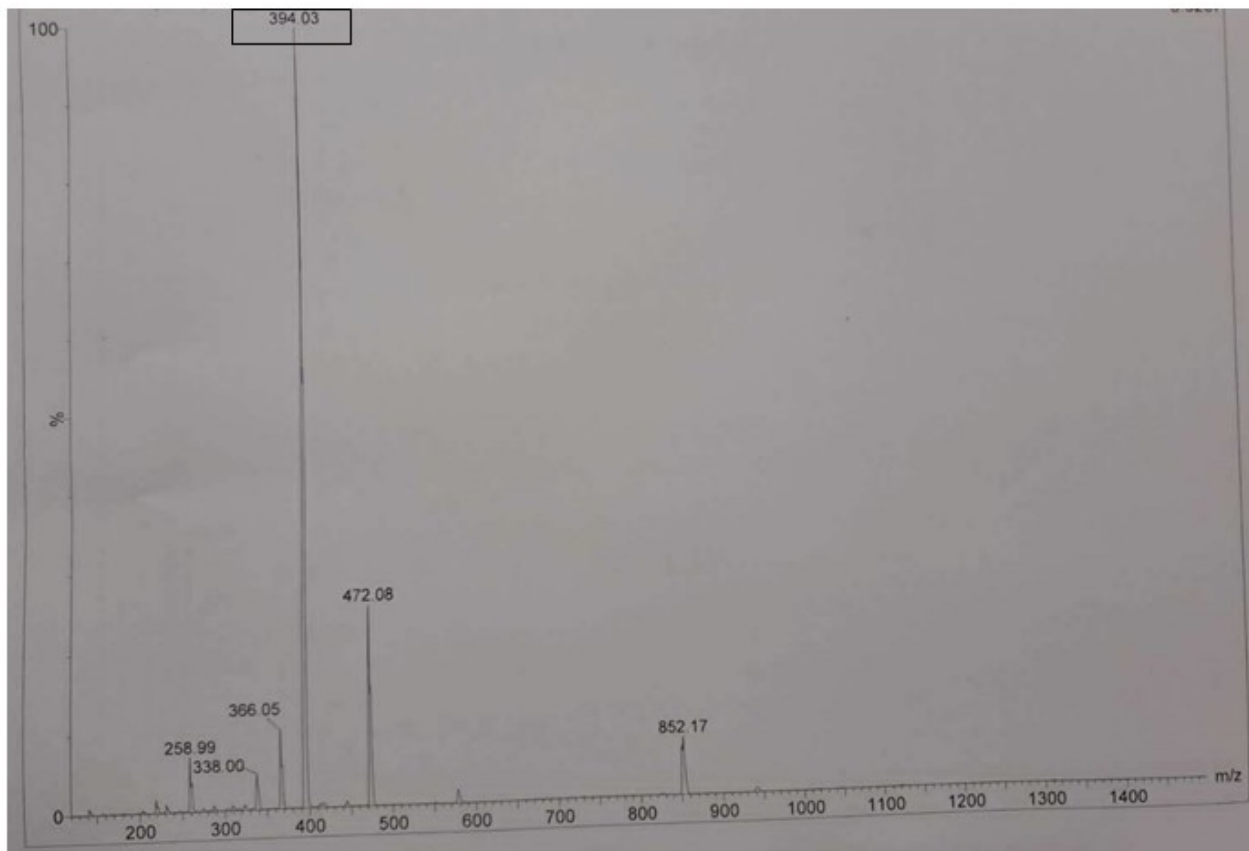

**Fig.S10:** Mass spectrum of  $[\text{Cu}(\text{DKMB})\text{NO}_3]$ .

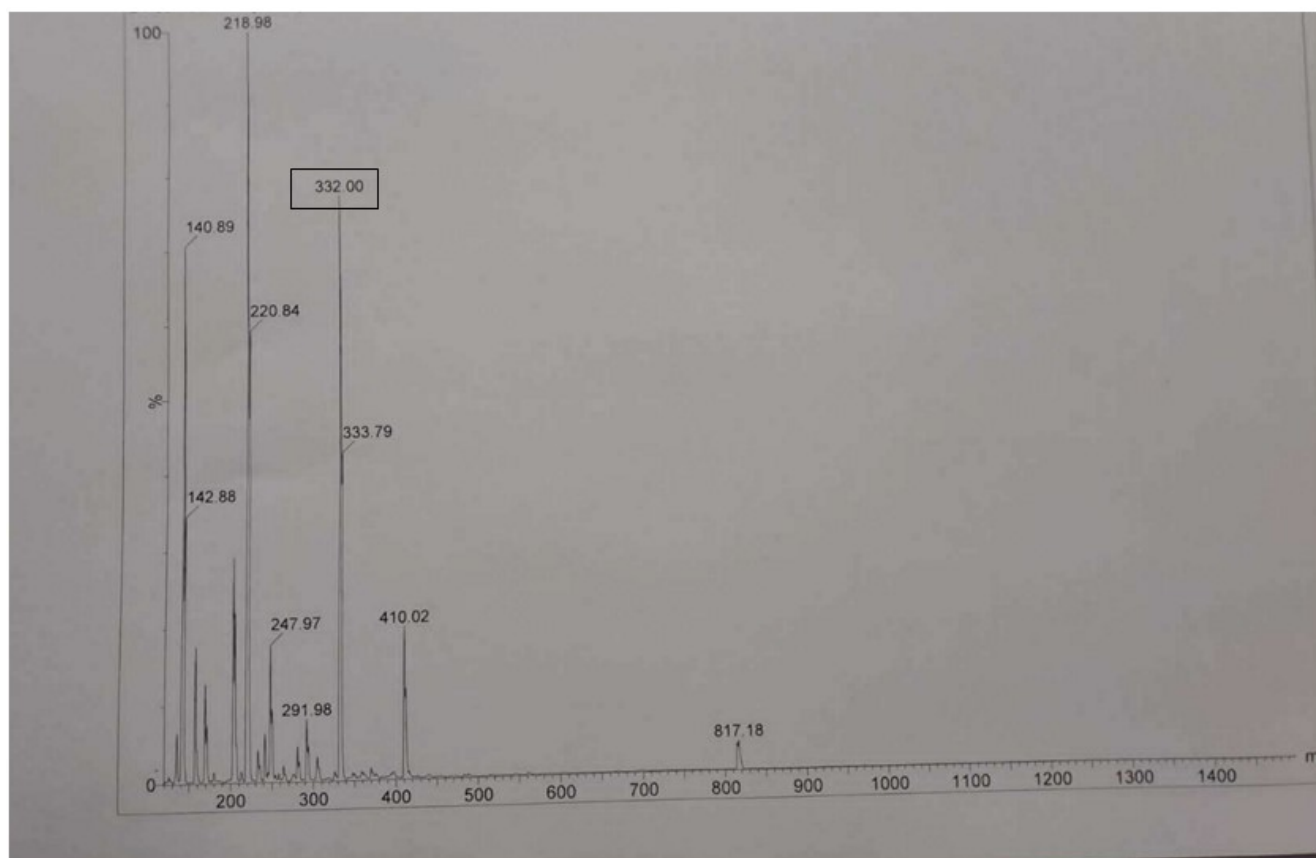

**Fig.S11:** Mass spectrum of  $[\text{Cu}(\text{APMBH})\text{Cl}_2]$ .

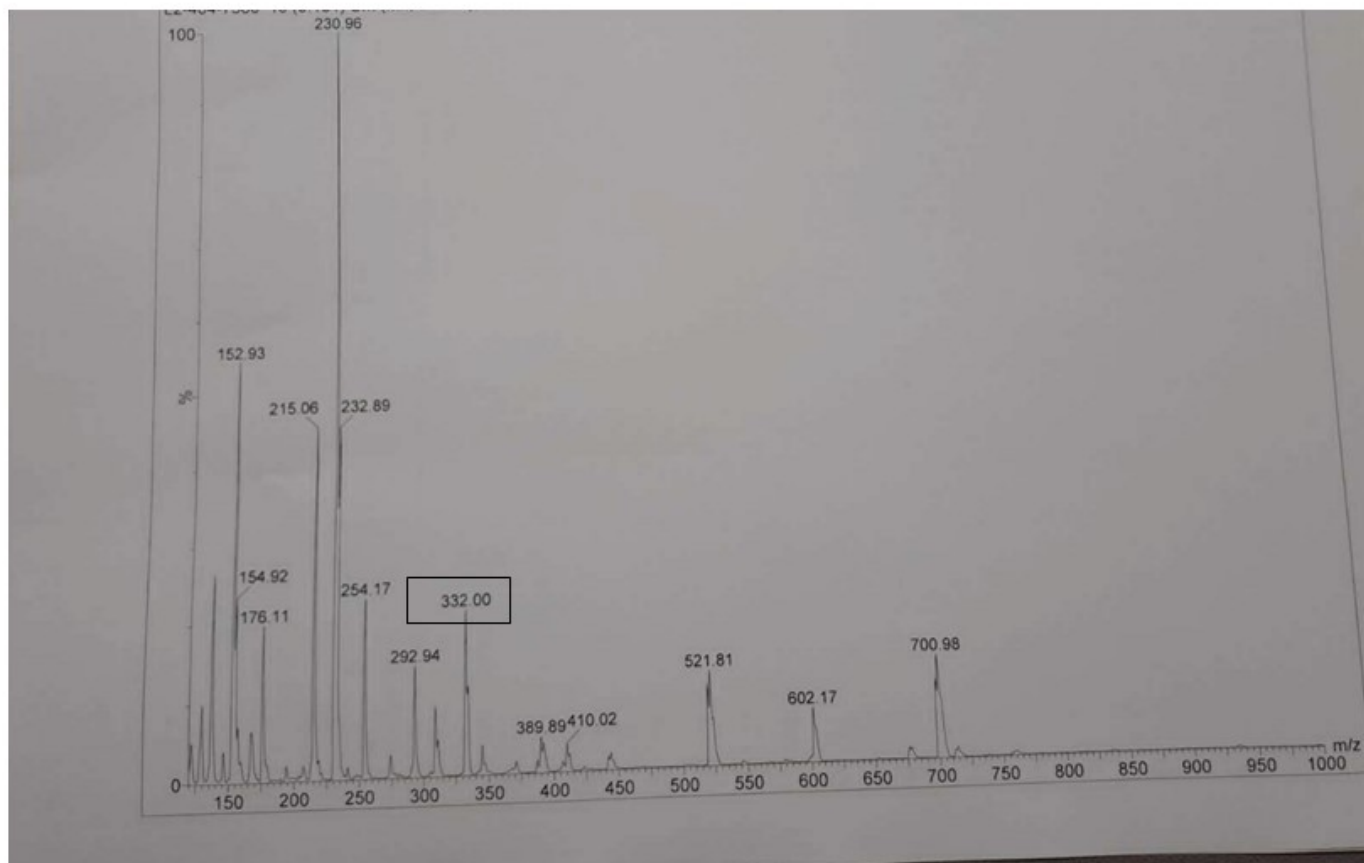

**Fig.S12:** Mass spectrum of  $[\text{Cu}(\text{APMB})\text{NO}_3(\text{H}_2\text{O})]$ .

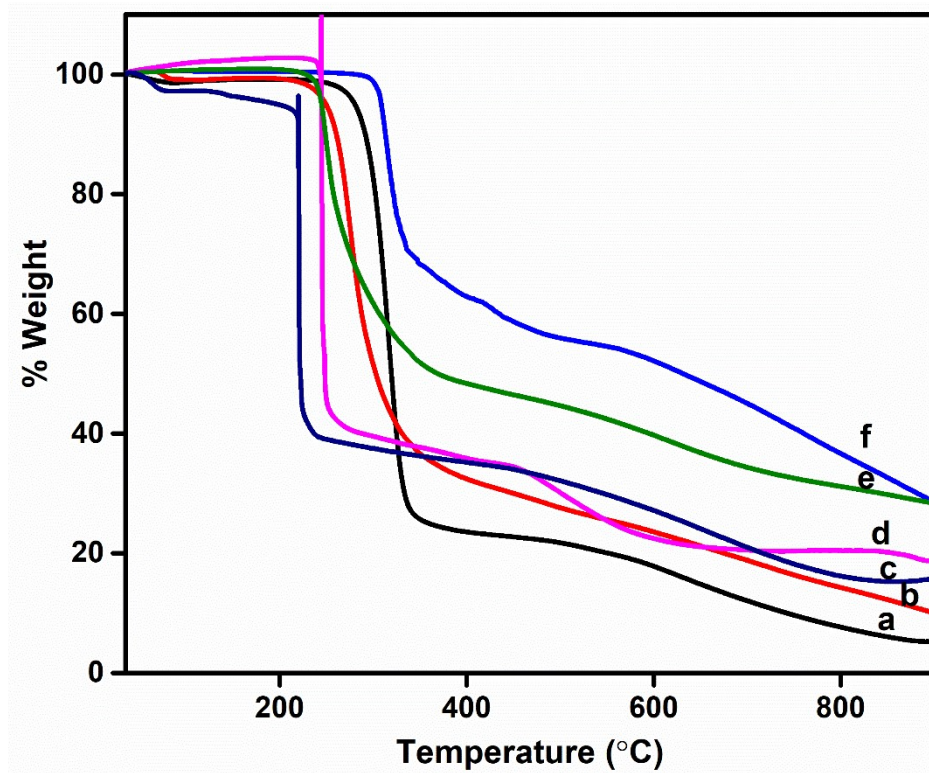

**Fig.S13:** TGA profile of (a) DKMBH·H<sub>2</sub>O, (b) APMBH·H<sub>2</sub>O, (c) [Cu(APMB)NO<sub>3</sub>(H<sub>2</sub>O)] (d) [Cu(DKMB)NO<sub>3</sub>], (e) [Cu(APMBH)Cl<sub>2</sub>] and (f) [Cu(DKMB)Cl].

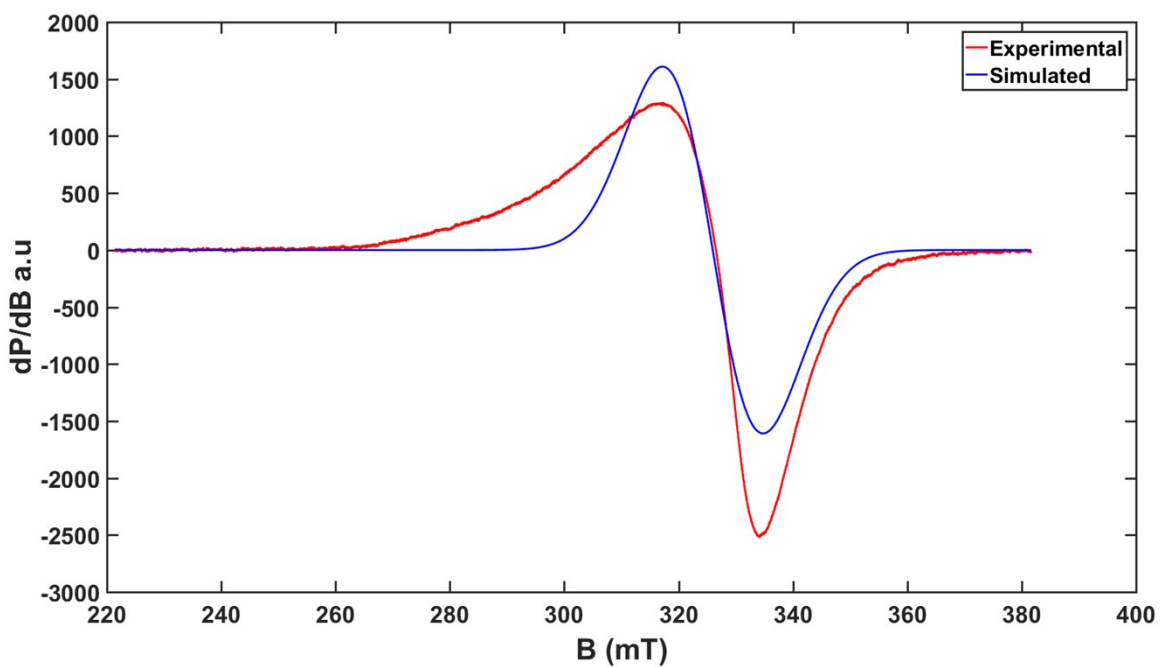

**Fig. S14:** EPR spectrum of complex 2 in polycrystalline state at 298 K.

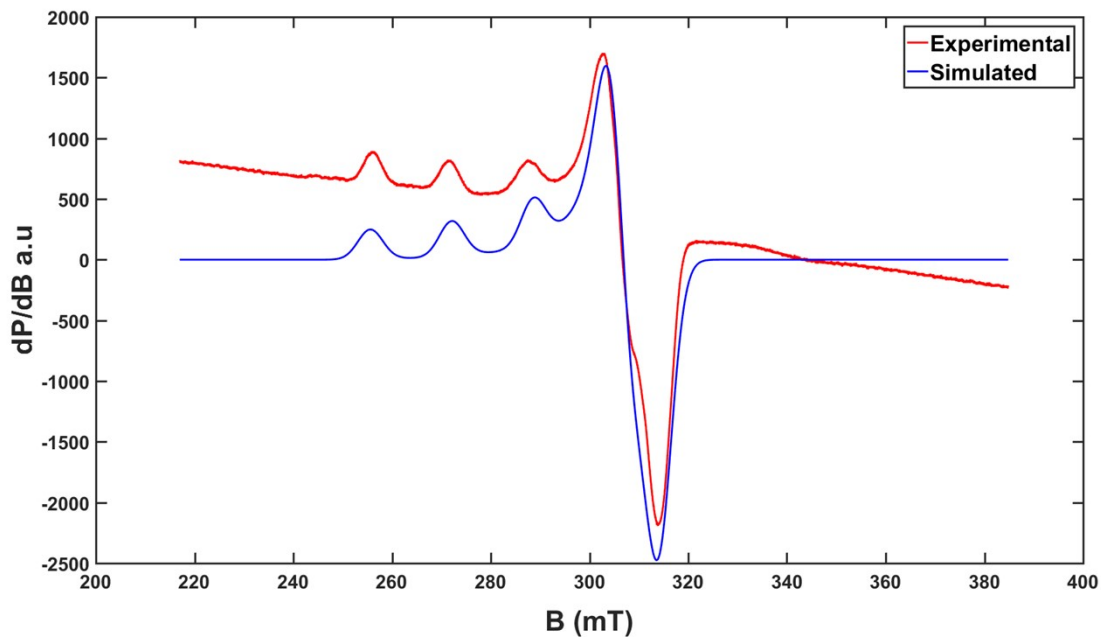

**Fig. S15:** EPR spectrum of complex **2** in DMF solution at 77 K.

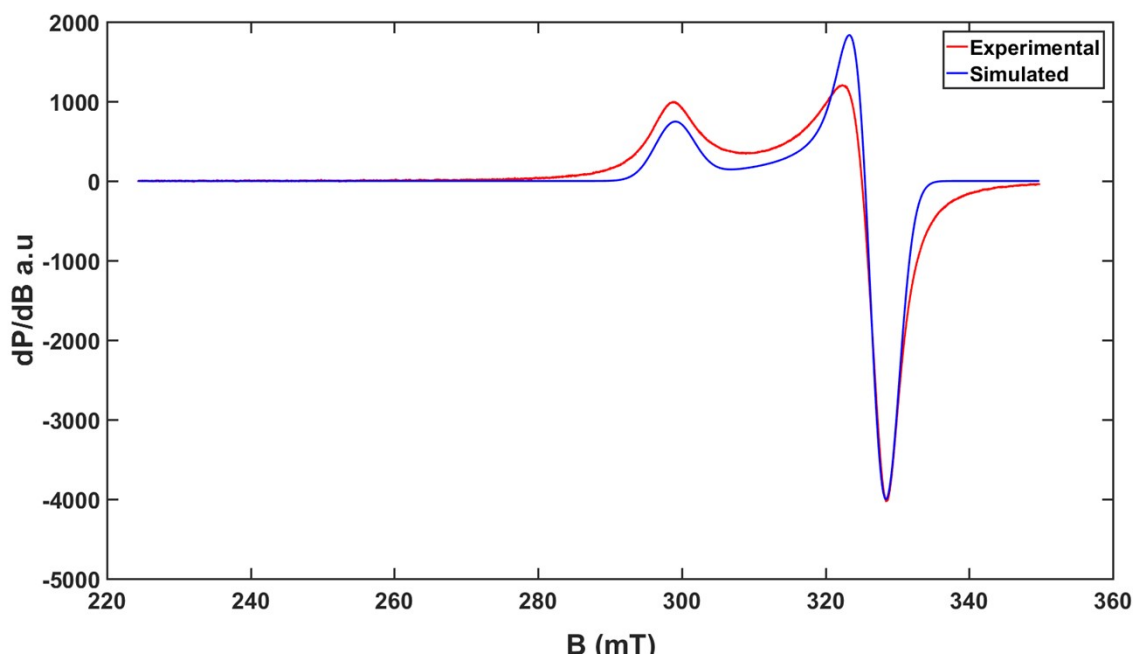

**Fig. S16:** EPR spectrum of complex **3** in polycrystalline state at 298 K.



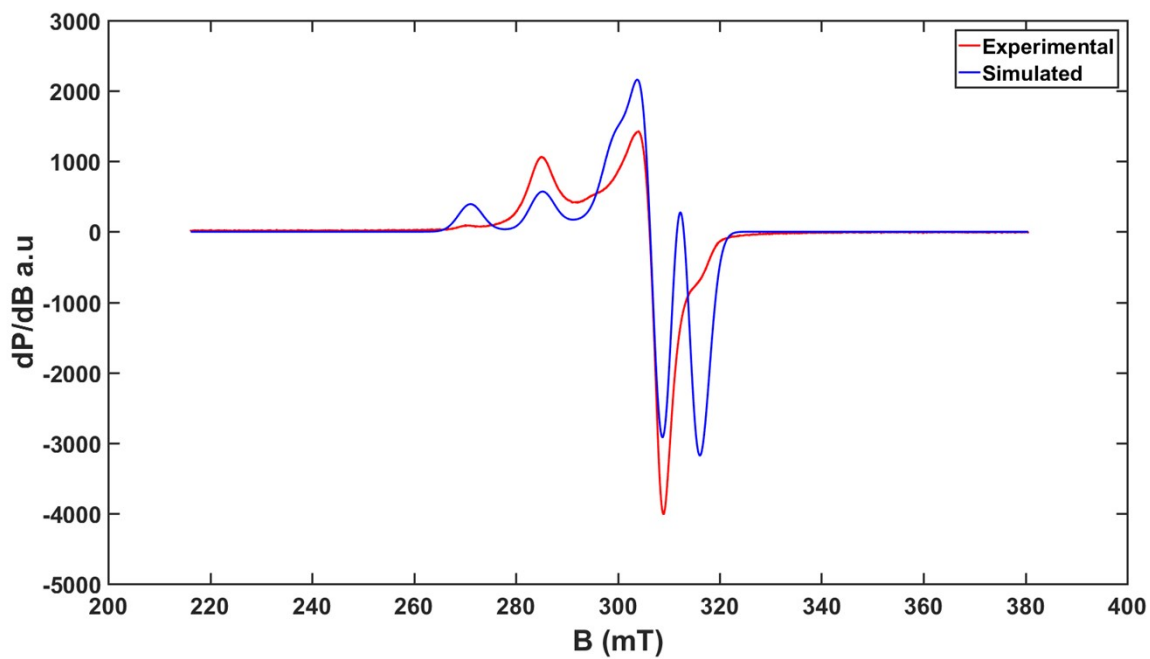

**Fig. S17:** EPR spectrum of complex **3** in DMF solution at 77 K.

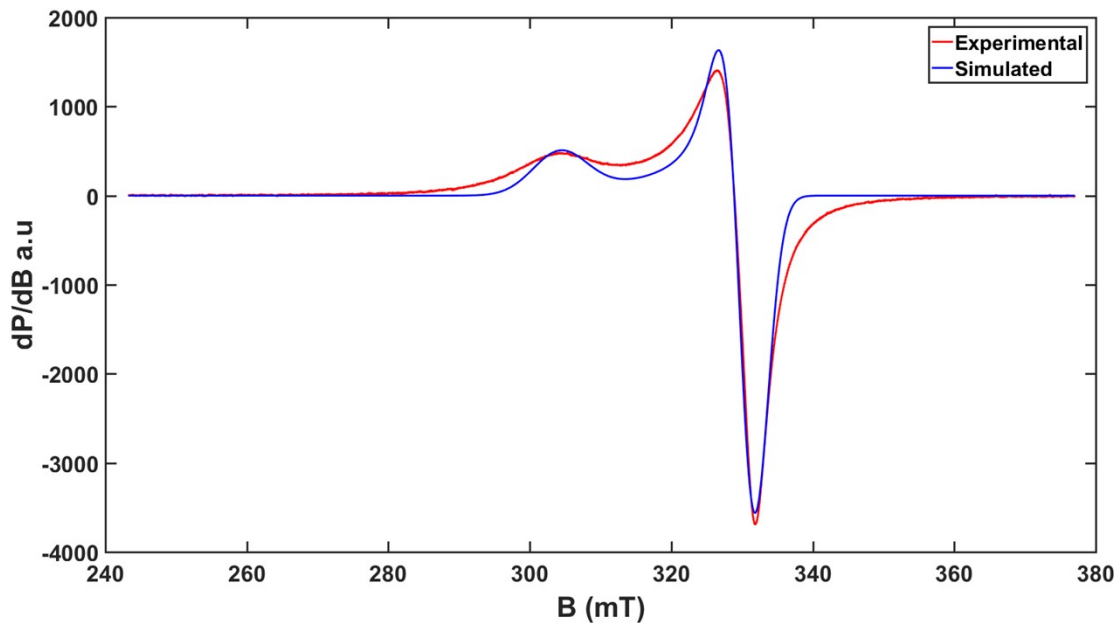

**Fig. S18:** EPR spectrum of complex **4** in polycrystalline state at 298 K.

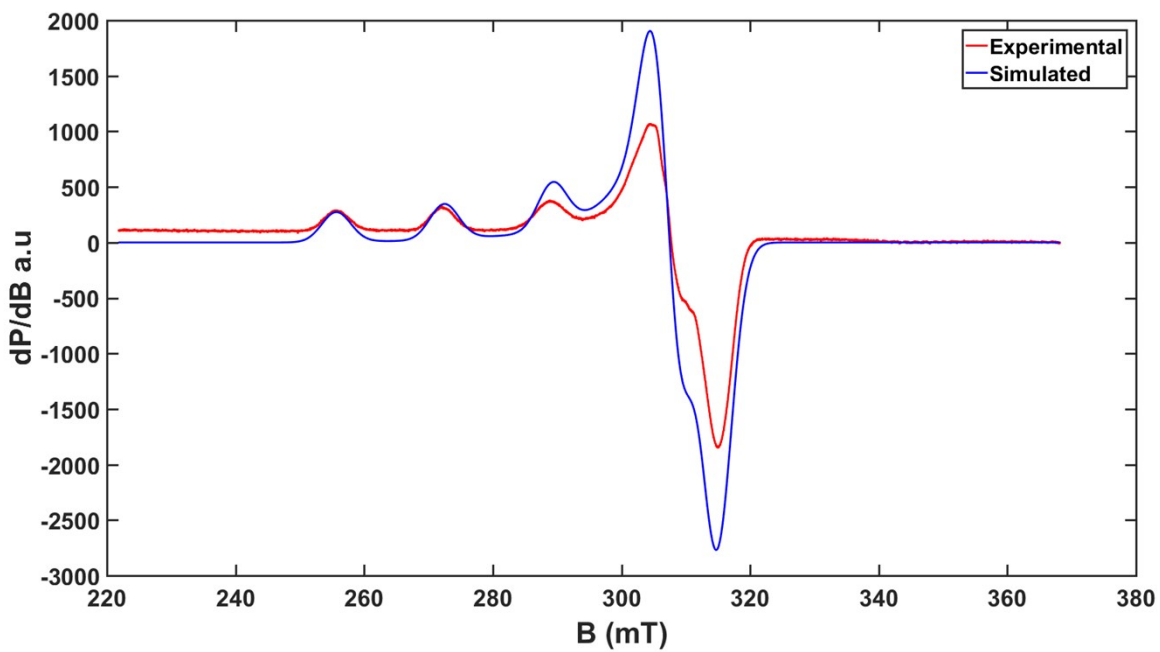

**Fig. S19:** EPR spectrum of complex **4** in DMF solution at 77 K.

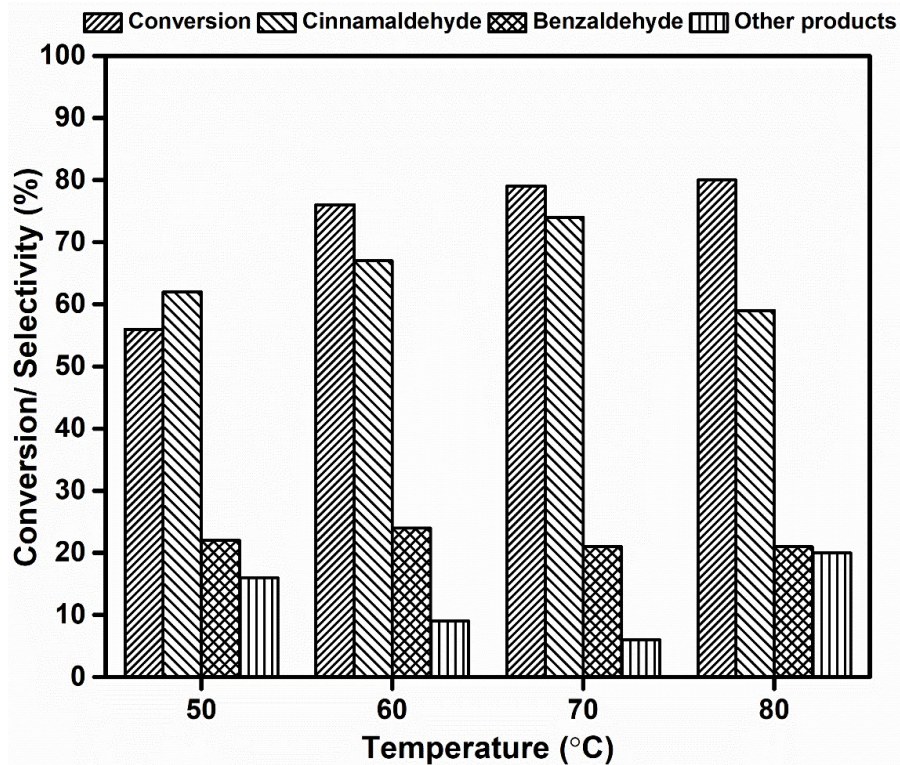

**Fig. S20:** Effect of temperature on cinnamaldehyde oxidation over complex **1** catalyst.

Reaction Conditions: Solvent = 2 mL, complex **1** (Catalyst) =  $12 \times 10^{-3}$  mmol, Cinnamaldehyde (Substrate) = 132  $\mu$ L (1 mmol), TBHP in water (oxidant) = 276  $\mu$ L (2 mmol),  $t = 4$  h.

(\*Other products are epoxycinnamaldehyde, epoxycinnamyl alcohol and cinnamic acid)

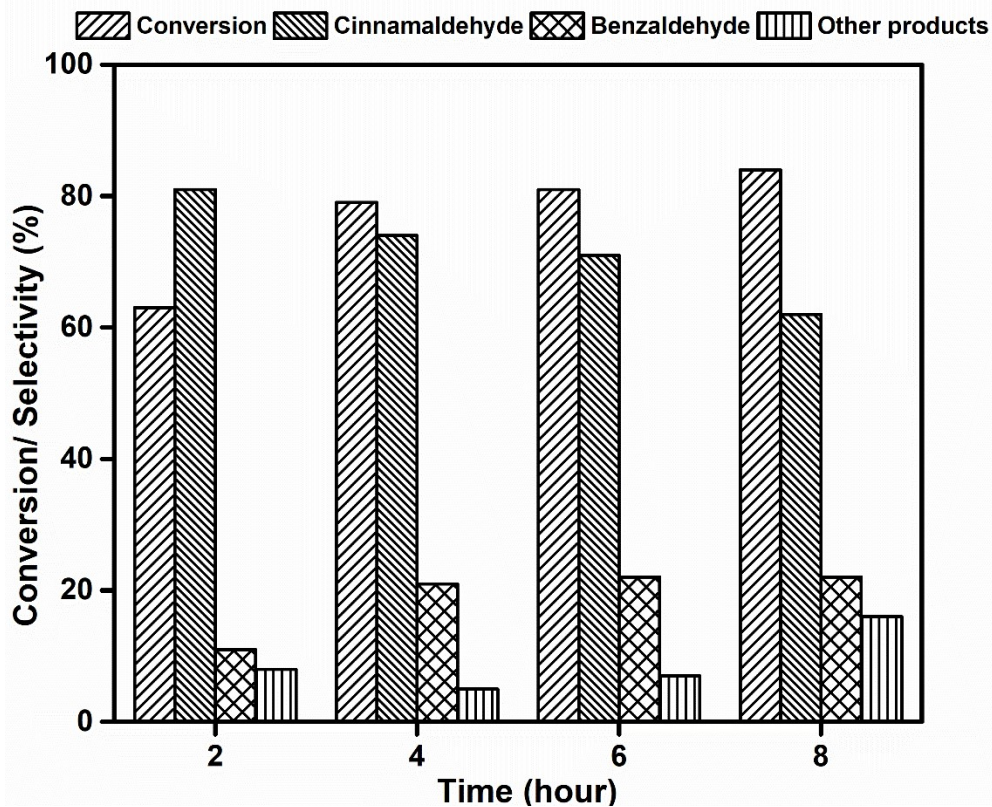

**Fig. S21:** Effect of reaction time on cinnamaldehyde oxidation over complex **1** catalyst.

Reaction Conditions: Solvent = 2 mL, complex **1** (Catalyst) =  $12 \times 10^{-3}$  mmol, Cinnamaldehyde (Substrate) = 132  $\mu\text{L}$  (1 mmol), TBHP in water (oxidant) = 276  $\mu\text{L}$  (2 mmol),  $T = 70$   $^{\circ}\text{C}$ .

(\*Other products are epoxycinnamaldehyde, epoxycinnamyl alcohol and cinnamic acid)

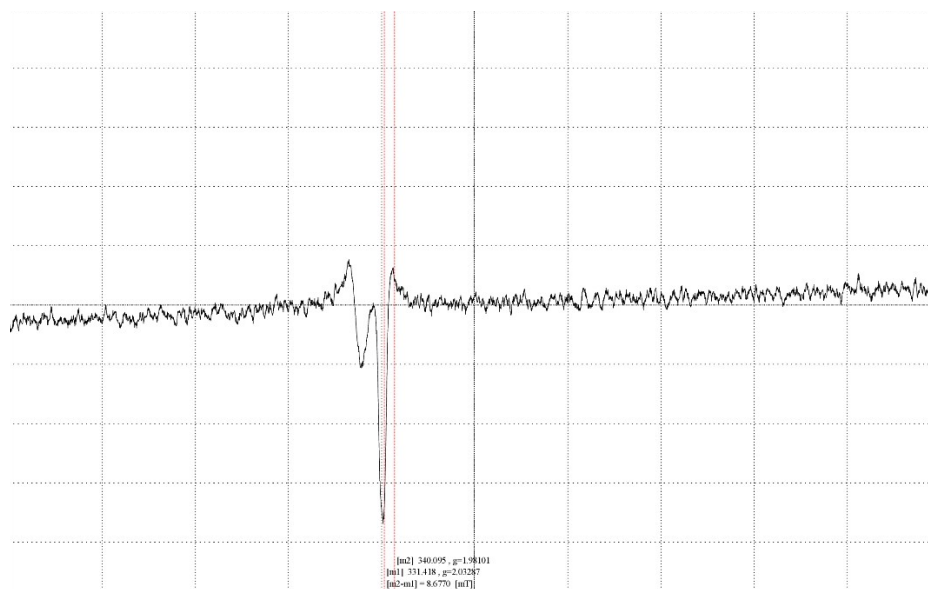

**Fig. S22:** EPR spectrum of complex **1** after adding TBHP
